# Supplementary material
Source: publisher site journal article supplement (https://www.dovepress.com/article/226770)
Supplement: Supplementary file 1 [file get_supplementary_file.php]

**Supplementary Figure 1：Clustering analysis of DEGs in lymph node metastatic group.**

**Supplementary Figure 2:Venn diagram of the overlapping DEGs in three groups.**

**Supplementary Figure 3:ERLIN2 expression in subtypes of breast cancer.**

**Supplementary Figure 4:Transwell assay analysis of MCF-7 cells after transfected with Si-ERLIN2 or control.**

**
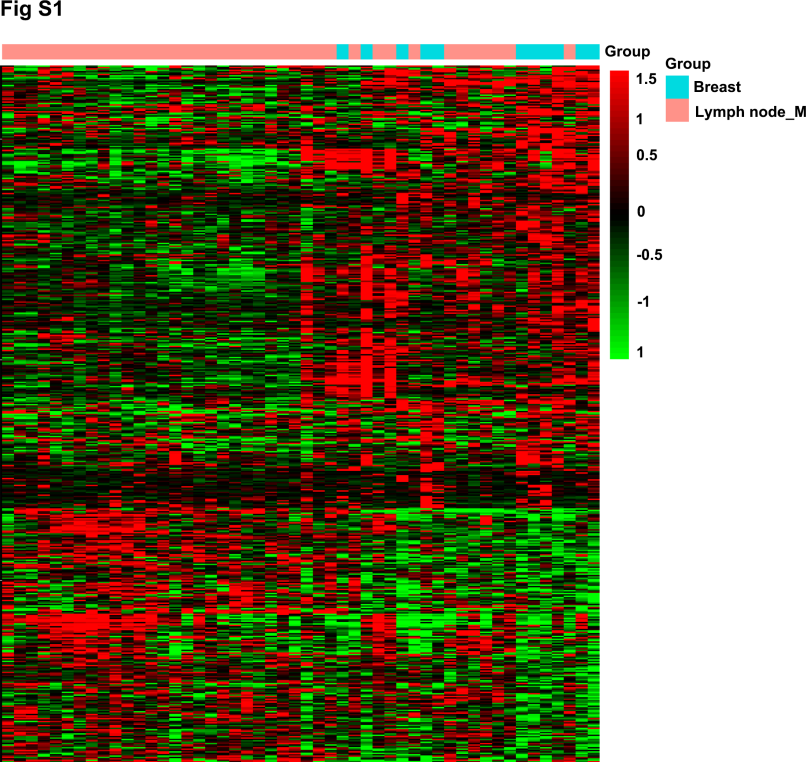
**

**
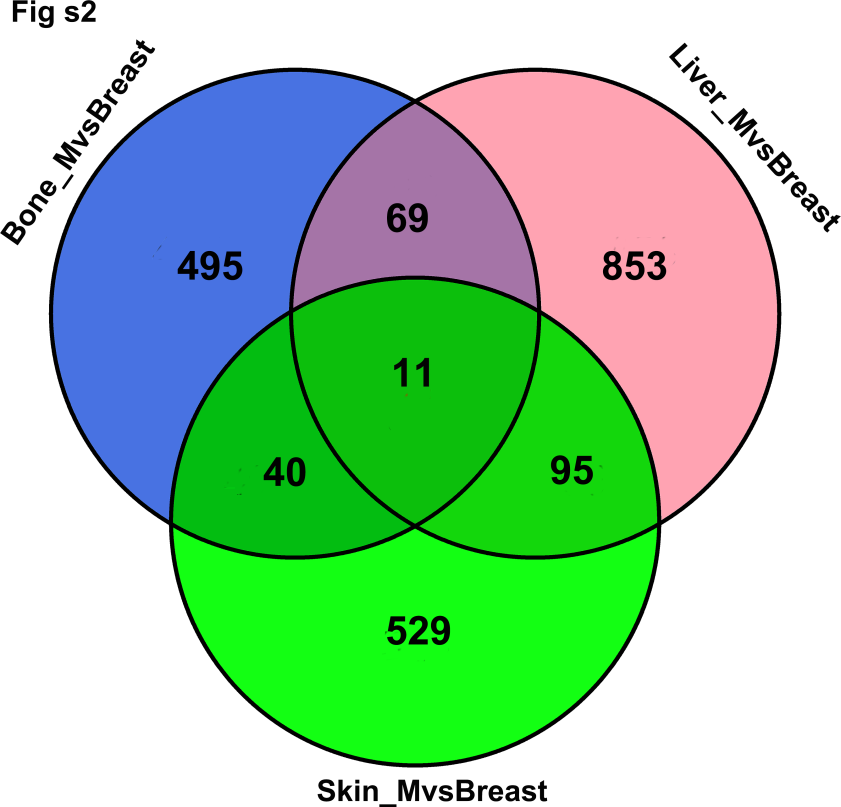
**

**
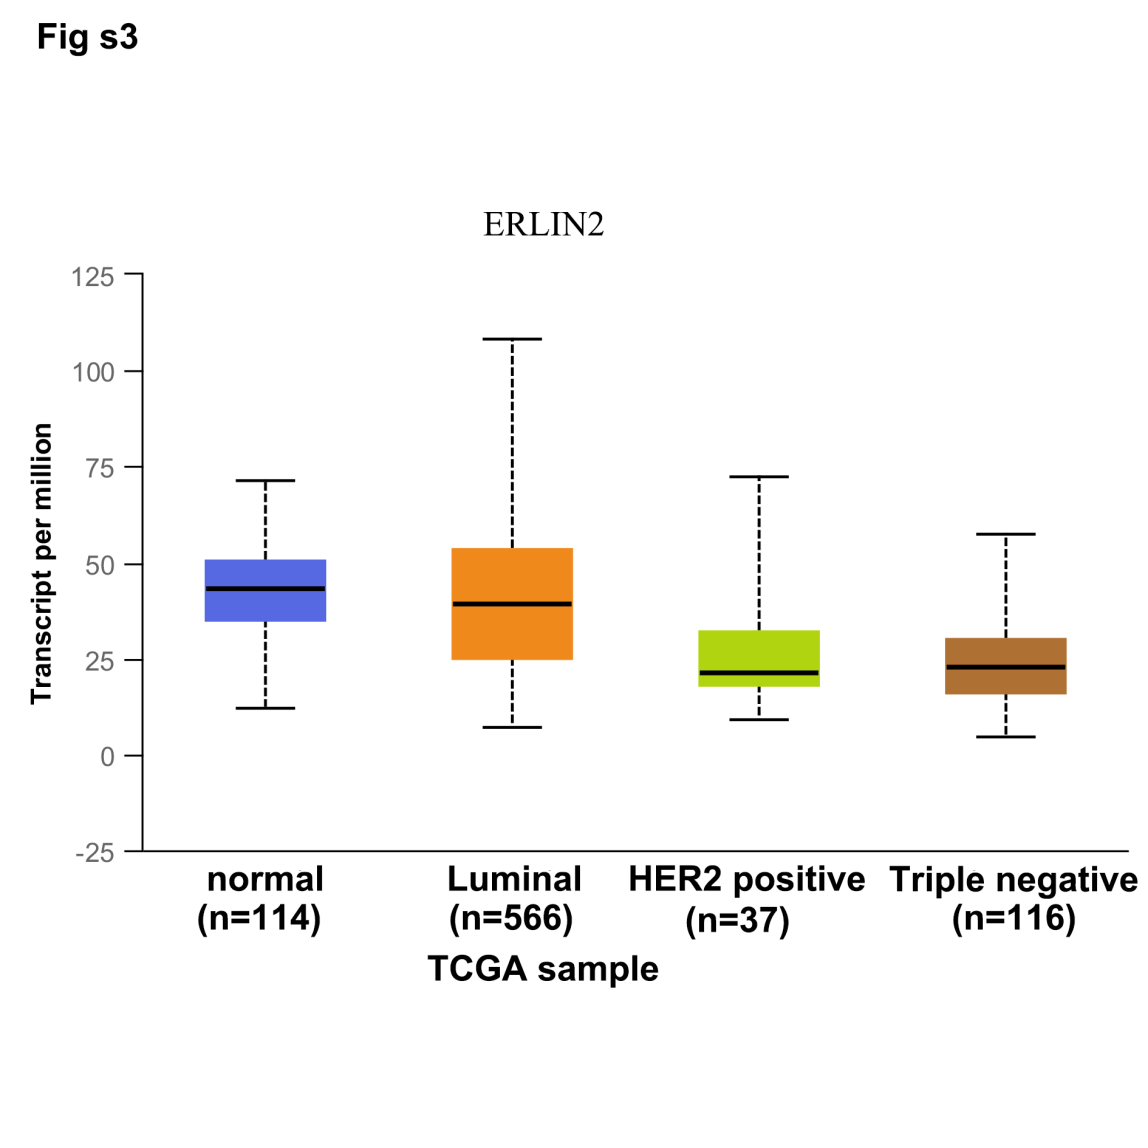
**

**
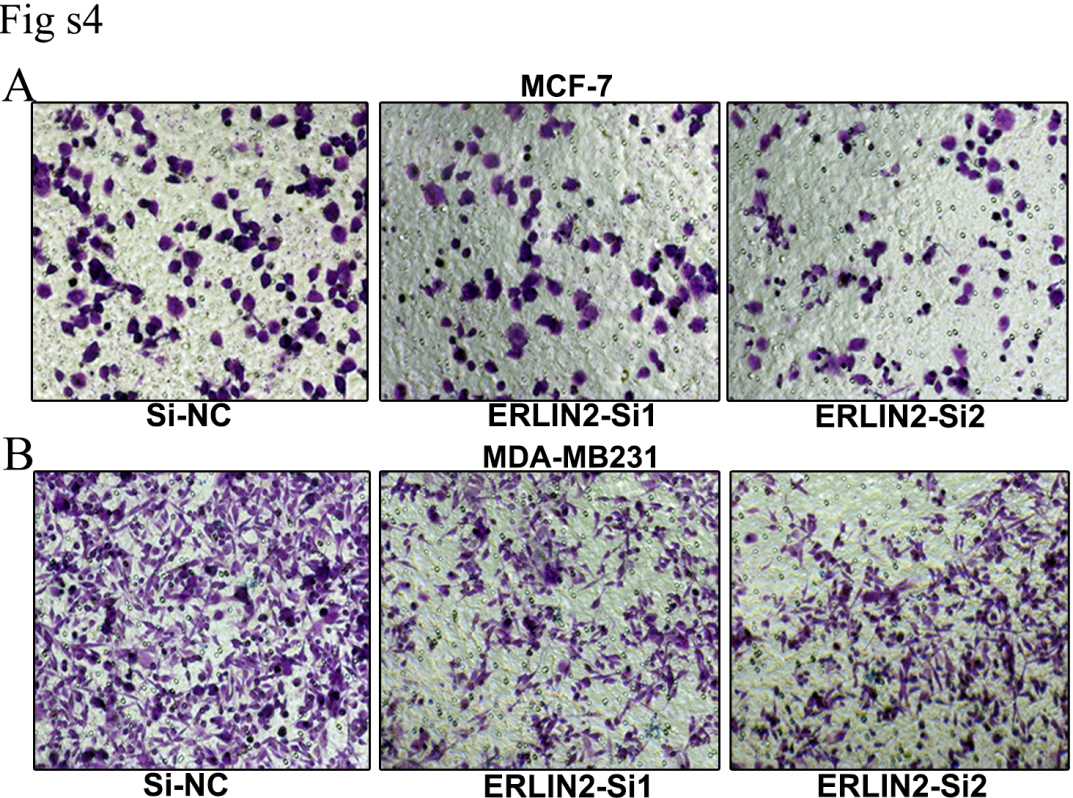
**

**Supplementary table 3: The detail information of top 10 DEGs in bone metastasis group.**

| Gene symbol | *P* value | Log FC | Function |
| --- | --- | --- | --- |
| KLK7 | 0.0188 | -19.7 | [Degradation of the extracellular matrix](http://pathcards.genecards.org/card/degradation_of_the_extracellular_matrix) |
| HBD | 0.0323 | 10 | [Response to elevated platelet cytosolic Ca2+](http://pathcards.genecards.org/card/response_to_elevated_platelet_cytosolic_ca2) |
| CT45A5 | 0.0307 | 9.4 | Encode members of the cancer/testis (CT) family of antigens |
| GRB14 | 0.0034 | -9.3 | [Cell surface interactions at the vascular wall](http://pathcards.genecards.org/card/cell_surface_interactions_at_the_vascular_wall) |
| SCGB2A2 | 0.0344 | -8.6 | Involved in breast cancer tumorigenesis |
| ELF5 | 0.0222 | -8.4 | Involved in [Prolactin Signaling Pathway](http://pathcards.genecards.org/card/prolactin_signaling_pathway) |
| GABRP | 0.0348 | -8.2 | Involved in  [Peptide ligand-binding receptors](http://pathcards.genecards.org/card/peptide_ligand-binding_receptors) |
| OLR1 | 0.0005 | -8.1 | [Cell surface interactions at the vascular wall](http://pathcards.genecards.org/card/cell_surface_interactions_at_the_vascular_wall) |
| ITGB8 | 0.0172 | -7.9 | Involved in [Beta-Adrenergic Signaling](http://pathcards.genecards.org/card/beta-adrenergic_signaling) |
| SFRP2 | 0.0052 | -7.6 | [Involved in Beta-Catenin-dependent Wnt Signaling](http://pathcards.genecards.org/card/wnt_signaling_pathways_beta-catenin-dependent_wnt_signaling) |

**Supplementary table 4 The detail information of top 10 DEGs in liver metastasis group.**

| Gene symbol | *P* value | Log FC | Function |
| --- | --- | --- | --- |
| APOH | 0.0001 | 212.3 | [Response to elevated platelet cytosolic Ca2+](http://pathcards.genecards.org/card/response_to_elevated_platelet_cytosolic_ca2) |
| FGG | 0.0001 | 171.9 | [Formation of Fibrin clot (Clotting Cascade)](http://pathcards.genecards.org/card/formation_of_fibrin_clot_(clotting_cascade)) |
| GC | 0.0001 | 162.3 | [Metabolism of water-soluble vitamins and cofactors](http://pathcards.genecards.org/card/metabolism_of_water-soluble_vitamins_and_cofactors) |
| ALB | 0.0001 | 161.7 | [CDK-mediated phosphorylation and removal of Cdc6](http://pathcards.genecards.org/card/cdk-mediated_phosphorylation_and_removal_of_cdc6) |
| FGB | 0.0001 | 120.8 | [Formation of fibrin clot (Clotting Cascade)](http://pathcards.genecards.org/card/formation_of_fibrin_clot_(clotting_cascade)) |
| APOA2 | 0.0001 | 110.3 | Involved in [PPAR Alpha Pathway](http://pathcards.genecards.org/card/ppar_alpha_pathway) |
| CFHR2 | 0.0001 | 100.2 | involved in  [Dense Deposit Disease](http://www.malacards.org/card/dense_deposit_disease) |
| HRG | 0.0001 | 96.8 | [Response to elevated platelet cytosolic Ca2+](http://pathcards.genecards.org/card/response_to_elevated_platelet_cytosolic_ca2) |
| APOB | 0.0001 | 95.9 | Involved in [lipoprotein metabolism](http://pathcards.genecards.org/card/lipoprotein_metabolism) |
| FGA | 0.0001 | 82.5 | [Involved in  [cytokine signaling in immune system](http://pathcards.genecards.org/card/cytokine_signaling_in_immune_system)](http://pathcards.genecards.org/card/wnt_signaling_pathways_beta-catenin-dependent_wnt_signaling) |

**Supplementary table 5: The detail information of top 10 DEGs in skin metastasis group.**

| Gene symbol | *P* value | Log FC | Function |
| --- | --- | --- | --- |
| MUCL1 | 0.032683 | -7.411331 | Involved in [metabolism of proteins](http://pathcards.genecards.org/card/metabolism_of_proteins) |
| SCGB2A2 | 0.01994 | -5.626532 | Associated with [breast Cancer](http://www.malacards.org/card/breast_cancer) |
| CCL18 | 0.024253 | -4.884583 | Involved in [PEDF Induced Signaling](http://pathcards.genecards.org/card/pedf_induced_signaling) |
| ZNF385B | 0.002845 | 4.384645 | Involved in nucleic acid binding and p53 binding |
| DHRS2 | 0.022195 | -4.337443 | Involved in oxidoreductase activity and carbonyl reductase (NADPH) activity |
| NBPF4 | 0.004354 | -4.292023 | Associated with [neuroblastoma](http://www.malacards.org/card/neuroblastoma) |
| CYP2B6 | 0.038801 | 4.19 | Involved in [cytochrome P450 - arranged by substrate type](http://pathcards.genecards.org/card/cytochrome_p450_-_arranged_by_substrate_type) |
| SCD5 | 0.006816 | 4.15 | Involved in  [fatty acid elongation](http://pathcards.genecards.org/card/fatty_acid_elongation) |
| MMP3 | 0.023313 | 4.08 | Involved in [adhesion](http://pathcards.genecards.org/card/adhesion) and [angiogenesis (CST)](http://pathcards.genecards.org/card/angiogenesis_(cst)). |
| CLUL1 | 0.000455 | 4.06 | Encoding a cone photoreceptor |

| Gene | Forward | Reverse |
| --- | --- | --- |
| ARNT2 | 5’- TGAGGGGTACAGGGAACAAG-3’ | 5’- GAGATTTGGGACATGTTCTGG-3’ |
| SNRPN | 5’-CCC AGC TTG CAT TGT TTC TAG-3’ | 5’-CAT CTT GCT ACT CTT GCC AAC-3’ |
| ERLIN2 | 5’-TCCACCACGAACTGAACCAG-3’ | 5’-AACAGCTCAATGTAGACCTCTTG-3’. |
| HDGFRP3 | 5’-AGCCTCCAGCAAACAAGTATCCTA-3’ | 5’-CCGTTTTGAGCCTGCTTTTTCAT-3’ |
| YBX2 | 5’-CGTAAGTCCCGCCGATTCAT-3’ | 5’-CCCTTTACTGCCAGGTCCTG-3’ |
| ERO1LB | 5’-TTCTGGATGATTGCTTGTGTGAT-3’ | 5’-GGTCGCTTCAGATTAACCTTGT-3’ |
| EBF4 | 5’-TTCGTGGAAAAGGACCGAGAG-3’ | 5’-GGCACATTTCGGGGTTCTTG-3’ |
| GAPDH | 5’-AGAAGGCTGGGGCTCATTTG-3’ | 5’-AGGGGCCATCCACAGTCTTC-3’ |

**Supplemental Table 1. Primer sequences for qRT-PCR**

**Supplemental Table 2. The sequences of small interfering RNA**

| Gene | anti-sense |
| --- | --- |
| Si-Control | 5’-ACGUGACACGUUCGGAGAATT-3’ |
| Si1-ERLIN2 | 5’-AAUGUAGACCUCUUGAAGCTT-3’ |
| Si2-ERLIN2 | 5’-UAGCAGUGUAGCACUCAGCTT-3’ |
